# Supplementary material for: Standard multiscale entropy reflects neural dynamics at mismatched temporal scales: What’s signal irregularity got to do with it?
Source: PubMed Central journal article supplement (PMC7241858; doi:10.1371/journal.pcbi.1007885), 2020-05-11
Supplement: pcbi.1007885.s001.pdf [file pcbi.1007885.s001.pdf]

## Supplementary Information for

### Standard multiscale entropy reflects neural dynamics at mismatched temporal scales

Julian Q. Kosciessa, Niels A. Kloosterman, and Douglas D. Garrett

Email: [kosciessa@mpib-berlin.mpg.de](mailto:kosciessa@mpib-berlin.mpg.de); [garrett@mpib-berlin.mpg.de](mailto:garrett@mpib-berlin.mpg.de)

#### **S1 Text. Systematic literature search assessing the prevalence of global similarity bounds.**

We performed a systematic literature search to assess the prevalence of global similarity bounds in current neuroscientific applications (heart rate variability applications are specifically marked). We searched Pubmed (<https://www.ncbi.nlm.nih.gov/pubmed>) with the following terms: *(MSE AND sample entropy AND EEG) OR (MSE AND brain AND variability) OR (MSE AND EEG AND variability) OR (multiscale entropy AND EEG AND variability)*. We excluded any studies that did not assess multiscale entropy, including studies that were restricted to sample entropy at scale 1. In addition, we added references from the main text that were not captured by the systematic search (highlighted in grey). For MSE applications, we checked the text for a notion of how similarity bounds were computed, i.e., whether it was calculated as  $r \times SD$  of the original time series or the coarse-grained time series. The following sections list the results of this qualitative review and is purely intended to characterize the prevalence of global similarity bounds, not as a qualitative judgement on the claims made in any particular paper. Our literature search revealed the following papers. The relative amount of studies with presumably global similarity bounds was as follows  $(39+13)/(39+13+4) = 0,928$ ; i.e., > 90%.

#### **Scale-invariant similarity bounds ( $r \times$ global SD)**

*We chose this category, when the article contained the specific information that  $r$  was calculated from the original signal (i.e., scale-invariant).*

Azami, Fernandez, and Escudero (2017)

Azami, Rostaghi, Abasolo, and Escudero (2017)

Carpentier et al. (2019)

Escudero, Abasolo, Hornero, Espino, and Lopez (2006) [but they note the issue]

Grandy, Garrett, Schmiedek, and Werkle-Bergner (2016)

Hadoush, Alafeef, and Abdulhay (2019)

Kaur et al. (2019)

M. Liu, Song, Liang, Knopfel, and Zhou (2019)

H. Liu et al. (2017) [HRV]

Lu et al. (2015)

McIntosh, Kovacevic, and Itier (2008)

Mizuno et al. (2010)

Weng et al. (2015)

#: 13

#### **Unclear, assumed scale-invariant similarity bounds ( $r \times$ global SD)**

*We chose this category, when the article did not contain any information about how  $r$  was calculated, or no reference was made to scale-specific adaptations. For many papers, Costa, Goldberger, and Peng (2002, 2005) or Richman and Moorman (2000) were cited, which use scale-invariant implementations.*

Raja Beharelle, Kovacevic, McIntosh, and Levine (2012)

Bertrand et al. (2016)

Catarino, Churches, Baron-Cohen, Andrade, and Ring (2011)

Chen et al. (2015)(HRV)

Chen et al. (2018) (HRV)  
Li, Chen, Li, Wang, and Liu (2016)  
Chiu et al. (2015) (HRV)  
Courtiol et al. (2016)  
Gao, Hu, Liu, and Cao (2015)  
Harati, Crowell, Huang, Mayberg, and Nemati (2019)  
Harati, Crowell, Mayberg, Jun, and Nemati (2016)  
Hasegawa et al. (2018)  
Heisz and McIntosh (2013)  
Heisz, Shedden, and McIntosh (2012)  
Hu and Liang (2012) [RM]  
Hussain, Saeed, Awan, and Idris (2018)  
Hussain, Aziz, et al. (2018)  
Jaworska et al. (2018)  
Kuntzelman, Jack Rhodes, Harrington, and Miskovic (2018)  
Lin et al. (2019) [BOLD]  
H. Liu et al. (2018)  
H. Y. Liu et al. (2018)  
Q. Liu, Chen, Fan, Abbod, and Shieh (2015)  
Q. Liu, Chen, Fan, Abbod, and Shieh (2017)  
McIntosh et al. (2014)  
Misic et al. (2015)  
Misic, Vakorin, Paus, and McIntosh (2011)  
Miskovic, Owens, Kuntzelman, and Gibb (2016)  
Park, Kim, Kim, Cichocki, and Kim (2007)  
Roldan, Molina-Pico, Cuesta-Frau, Martinez, and Crespo (2011)  
Szostakiwskyj, Willatt, Cortese, and Protzner (2017)  
Takahashi et al. (2009)  
Takahashi et al. (2010)  
Takahashi et al. (2016)  
Ueno et al. (2015)  
Yang et al. (2013)  
H. Y. Wang, McIntosh, Kovacevic, Karachalios, and Protzner (2016)  
H. Wang, Pexman, Turner, Cortese, and Protzner (2018)  
Wei et al. (2014)

#: 39

#### **Scale-wise similarity bounds (r x scale-wise SD)**

*We chose this category, when the article either specified that scale-wise recalculation of r parameters was performed, or when the description could allow that inference.*

Fabris et al. (2014) [but with unclear variations in r]  
Sleimen-Malkoun et al. (2015)  
Valencia et al. (2009) [HRV]  
Zavala-Yoe, Ramirez-Mendoza, and Cordero (2015)

#: 4

#### **Not applicable**

*We chose this category, when multi-scale entropy was not used in the study (i.e., erroneous listing of paper).*

El-Gohary, McNames, and Elsas (2008)  
Erdogan, Yucel, and Akin (2014)  
Fernandez, Gomez, Hornero, and Lopez-Ibor (2013)  
Heunis, Aldrich, and de Vries (2016)  
Hier, Jao, and Brint (1994)  
Kielar et al. (2016) [BOLD MSE, single scale]  
Nazari et al. (2019)  
Puce, Berkovic, Cadusch, and Bladin (1994)  
Sinai, Phillips, Chertkow, and Kabani (2010)  
Verhaeghe, Gravel, and Reader (2010)  
Xu, Cui, Hong, and Liang (2015)

## Supplementary References

- Azami, H., Fernandez, A., & Escudero, J. (2017). Refined multiscale fuzzy entropy based on standard deviation for biomedical signal analysis. *Med Biol Eng Comput*, 55(11), 2037-2052. doi:10.1007/s11517-017-1647-5
- Azami, H., Rostaghi, M., Abasolo, D., & Escudero, J. (2017). Refined Composite Multiscale Dispersion Entropy and its Application to Biomedical Signals. *Ieee Transactions on Biomedical Engineering*, 64(12), 2872-2879. doi:10.1109/tbme.2017.2679136
- Bandt, C., & Pompe, B. (2002). Permutation entropy: A natural complexity measure for time series. *Physical Review Letters*, 88(17). doi:10.1103/PhysRevLett.88.174102
- Bertrand, J. A., McIntosh, A. R., Postuma, R. B., Kovacevic, N., Latreille, V., Panisset, M., . . . Gagnon, J. F. (2016). Brain Connectivity Alterations Are Associated with the Development of Dementia in Parkinson's Disease. *Brain Connectivity*, 6(3), 216-224. doi:10.1089/brain.2015.0390
- Carpentier, S. M., McCulloch, A. R., Brown, T. M., Ritter, P., Wang, Z., Salimpoor, V., . . . McIntosh, A. R. (2019). Complexity matching: brain signals mirror environment information patterns during music listening and reward. *bioRxiv*.
- Catarino, A., Churches, O., Baron-Cohen, S., Andrade, A., & Ring, H. (2011). Atypical EEG complexity in autism spectrum conditions: A multiscale entropy analysis. *Clinical Neurophysiology*, 122(12), 2375-2383. doi:10.1016/j.clinph.2011.05.004
- Chen, C. H., Huang, P. W., Tang, S. C., Shieh, J. S., Lai, D. M., Wu, A. Y., & Jeng, J. S. (2015). Complexity of Heart Rate Variability Can Predict Stroke-In-Evolution in Acute Ischemic Stroke Patients. *Sci Rep*, 5, 17552. doi:10.1038/srep17552
- Chen, C. H., Tang, S. C., Lee, D. Y., Shieh, J. S., Lai, D. M., Wu, A. Y., & Jeng, J. S. (2018). Impact of Supratentorial Cerebral Hemorrhage on the Complexity of Heart Rate Variability in Acute Stroke. *Sci Rep*, 8(1), 11473. doi:10.1038/s41598-018-29961-y
- Chiu, H. C., Lin, Y. H., Lo, M. T., Tang, S. C., Wang, T. D., Lu, H. C., . . . Peng, C. K. (2015). Complexity of cardiac signals for predicting changes in alpha-waves after stress in patients undergoing cardiac catheterization. *Scientific Reports*, 5. doi:10.1038/srep13315
- Costa, M., Goldberger, A. L., & Peng, C. K. (2002). Multiscale entropy analysis of complex physiologic time series. *Physical Review Letters*, 89(6). doi:10.1103/PhysRevLett.89.068102
- Costa, M., Goldberger, A. L., & Peng, C. K. (2005). Multiscale entropy analysis of biological signals. *Physical Review E*, 71(2). doi:10.1103/PhysRevE.71.021906
- Courtiol, J., Perdikis, D., Petkoski, S., Muller, V., Huys, R., Sleimen-Malkoun, R., & Jirsa, V. K. (2016). The multiscale entropy: Guidelines for use and interpretation in brain signal analysis. *Journal of Neuroscience Methods*, 273, 175-190. doi:10.1016/j.jneumeth.2016.09.004
- El-Gohary, M., McNames, J., & Elsas, S. (2008). User-guided interictal spike detection. *Conf Proc IEEE Eng Med Biol Soc*, 2008, 821-824. doi:10.1109/iembs.2008.4649280
- Erdogan, S. B., Yucel, M. A., & Akin, A. (2014). Analysis of task-evoked systemic interference in fNIRS measurements: insights from fMRI. *Neuroimage*, 87, 490-504. doi:10.1016/j.neuroimage.2013.10.024
- Escudero, J., Abasolo, D., Hornero, R., Espino, P., & Lopez, M. (2006). Analysis of electroencephalograms in Alzheimer's disease patients with multiscale entropy. *Physiological Measurement*, 27(11), 1091-1106. doi:10.1088/0967-3334/27/11/004
- Fabris, C., Sparacino, G., Sejling, A. S., Goljahani, A., Duun-Henriksen, J., Remvig, L. S., . . . Cobelli, C. (2014). Hypoglycemia-Related Electroencephalogram Changes Assessed by Multiscale Entropy. *Diabetes Technology & Therapeutics*, 16(10), 688-694. doi:10.1089/dia.2013.0331
- Fernandez, A., Gomez, C., Hornero, R., & Lopez-lbor, J. J. (2013). Complexity and schizophrenia. *Prog Neuropsychopharmacol Biol Psychiatry*, 45, 267-276. doi:10.1016/j.pnpbbp.2012.03.015
- Gao, J., Hu, J., Liu, F., & Cao, Y. (2015). Multiscale entropy analysis of biological signals: a fundamental bi-scaling law. *Front Comput Neurosci*, 9, 64. doi:10.3389/fncom.2015.00064
- Grandy, T. H., Garrett, D. D., Schmiedek, F., & Werkle-Bergner, M. (2016). On the estimation of brain signal entropy from sparse neuroimaging data. *Scientific Reports*, 6. doi:10.1038/srep23073
- Hadoush, H., Alafeef, M., & Abdulhay, E. (2019). Brain Complexity in Children with Mild and Severe Autism Spectrum Disorders: Analysis of Multiscale Entropy in EEG. *Brain Topogr*. doi:10.1007/s10548-019-00711-1
- Harati, S., Crowell, A., Huang, Y., Mayberg, H., & Nemati, S. (2019). Classifying Depression Severity in Recovery from Major Depressive Disorder via Dynamic Facial Features. *IEEE J Biomed Health Inform*. doi:10.1109/jbhi.2019.2930604
- Harati, S., Crowell, A., Mayberg, H., Jun, K., & Nemati, S. (2016). Discriminating clinical phases of recovery from major depressive disorder using the dynamics of facial expression. *Conf Proc IEEE Eng Med Biol Soc*, 2016, 2254-2257. doi:10.1109/embs.2016.7591178

- Hasegawa, C., Takahashi, T., Yoshimura, Y., Nobukawa, S., Ikeda, T., Saito, D. N., . . . Kikuchi, M. (2018). Developmental Trajectory of Infant Brain Signal Variability: A Longitudinal Pilot Study. *Front Neurosci*, 12, 566. doi:10.3389/fnins.2018.00566
- Heisz, J. J., & McIntosh, A. R. (2013). Applications of EEG Neuroimaging Data: Event-related Potentials, Spectral Power, and Multiscale Entropy. *Jove-Journal of Visualized Experiments*(76). doi:10.3791/50131
- Heisz, J. J., Shedden, J. M., & McIntosh, A. R. (2012). Relating brain signal variability to knowledge representation. *Neuroimage*, 63(3), 1384-1392. doi:10.1016/j.neuroimage.2012.08.018
- Heunis, T. M., Aldrich, C., & de Vries, P. J. (2016). Recent Advances in Resting-State Electroencephalography Biomarkers for Autism Spectrum Disorder-A Review of Methodological and Clinical Challenges. *Pediatr Neurol*, 61, 28-37. doi:10.1016/j.pediatrneurol.2016.03.010
- Hier, D. B., Jao, C. S., & Brint, S. U. (1994). The Mental Status Expert (MSE): an expert system for scoring and interpreting the mental status examination. *Proc Annu Symp Comput Appl Med Care*, 1053.
- Hu, M., & Liang, H. (2012). Adaptive multiscale entropy analysis of multivariate neural data. *IEEE Trans Biomed Eng*, 59(1), 12-15. doi:10.1109/tbme.2011.2162511
- Hussain, L., Aziz, W., Saeed, S., Shah, S. A., Nadeem, M. S. A., Awan, I. A., . . . Kazmi, S. Z. H. (2018). Quantifying the dynamics of electroencephalographic (EEG) signals to distinguish alcoholic and non-alcoholic subjects using an MSE based K-d tree algorithm. *Biomed Tech (Berl)*, 63(4), 481-490. doi:10.1515/bmt-2017-0041
- Hussain, L., Saeed, S., Awan, I. A., & Idris, A. (2018). Multiscaled Complexity Analysis of EEG Epileptic Seizure Using Entropy-Based Techniques. *Archives of Neuroscience*, 5(1). doi:10.5812/archneurosci.61161
- Jaworska, N., Wang, H., Smith, D. M., Blier, P., Knott, V., & Protzner, A. B. (2018). Pre-treatment EEG signal variability is associated with treatment success in depression. *Neuroimage Clin*, 17, 368-377. doi:10.1016/j.nicl.2017.10.035
- Kaur, Y., Ouyang, G., Junge, M., Sommer, W., Liu, M., Zhou, C., & Hildebrandt, A. (2019). The reliability and psychometric structure of Multi-Scale Entropy measured from EEG signals at rest and during face and object recognition tasks. *J Neurosci Methods*, 326, 108343. doi:10.1016/j.jneumeth.2019.108343
- Kielar, A., Deschamps, T., Chu, R. K., Jokel, R., Khatamian, Y. B., Chen, J. J., & Meltzer, J. A. (2016). Identifying Dysfunctional Cortex: Dissociable Effects of Stroke and Aging on Resting State Dynamics in MEG and fMRI. *Front Aging Neurosci*, 8, 40. doi:10.3389/fnagi.2016.00040
- Kuntzelman, K., Jack Rhodes, L., Harrington, L. N., & Miskovic, V. (2018). A practical comparison of algorithms for the measurement of multiscale entropy in neural time series data. *Brain Cogn*, 123, 126-135. doi:10.1016/j.bandc.2018.03.010
- Li, C. X., Chen, Y. N., Li, Y. J., Wang, J., & Liu, T. (2016). Complexity analysis of brain activity in attention-deficit/hyperactivity disorder: A multiscale entropy analysis. *Brain Research Bulletin*, 124, 12-20. doi:10.1016/j.brainresbull.2016.03.007
- Lin, C., Lee, S. H., Huang, C. M., Chen, G. Y., Ho, P. S., Liu, H. L., . . . Wu, S. C. (2019). Increased brain entropy of resting-state fMRI mediates the relationship between depression severity and mental health-related quality of life in late-life depressed elderly. *J Affect Disord*, 250, 270-277. doi:10.1016/j.jad.2019.03.012
- Liu, H., Yang, Z., Meng, F., Guan, Y., Ma, Y., Liang, S., . . . Li, L. (2017). Impairment of heart rhythm complexity in patients with drug-resistant epilepsy: An assessment with multiscale entropy analysis. *Epilepsy Research*, 138, 11-17. doi:10.1016/j.epilepsyres.2017.10.002
- Liu, H., Yang, Z., Meng, F., Huang, L., Qu, W., Hao, H., . . . Li, L. (2018). Chronic vagus nerve stimulation reverses heart rhythm complexity in patients with drug-resistant epilepsy: An assessment with multiscale entropy analysis. *Epilepsy Behav*, 83, 168-174. doi:10.1016/j.yebeh.2018.03.035
- Liu, H. Y., Yang, Z., Meng, F. G., Guan, Y. G., Ma, Y. S., Liang, S. L., . . . Li, L. M. (2018). Preoperative Heart Rate Variability as Predictors of Vagus Nerve Stimulation Outcome in Patients with Drug-resistant Epilepsy. *Sci Rep*, 8(1), 3856. doi:10.1038/s41598-018-21669-3
- Liu, M., Song, C., Liang, Y., Knopfel, T., & Zhou, C. (2019). Assessing spatiotemporal variability of brain spontaneous activity by multiscale entropy and functional connectivity. *Neuroimage*, 198, 198-220. doi:10.1016/j.neuroimage.2019.05.022
- Liu, Q., Chen, Y. F., Fan, S. Z., Abbod, M. F., & Shieh, J. S. (2015). EEG Signals Analysis Using Multiscale Entropy for Depth of Anesthesia Monitoring during Surgery through Artificial Neural Networks. *Computational and Mathematical Methods in Medicine*. doi:10.1155/2015/232381
- Liu, Q., Chen, Y. F., Fan, S. Z., Abbod, M. F., & Shieh, J. S. (2017). EEG artifacts reduction by multivariate empirical mode decomposition and multiscale entropy for monitoring depth of

- anaesthesia during surgery. *Medical & Biological Engineering & Computing*, 55(8), 1435-1450. doi:10.1007/s11517-016-1598-2
- Lu, W. Y., Chen, J. Y., Chang, C. F., Weng, W. C., Lee, W. T., & Shieh, J. S. (2015). Multiscale Entropy of Electroencephalogram as a Potential Predictor for the Prognosis of Neonatal Seizures. *Plos One*, 10(12). doi:10.1371/journal.pone.0144732
- McIntosh, A. R., Kovacevic, N., & Itier, R. J. (2008). Increased Brain Signal Variability Accompanies Lower Behavioral Variability in Development. *Plos Computational Biology*, 4(7). doi:10.1371/journal.pcbi.1000106
- McIntosh, A. R., Vakorin, V., Kovacevic, N., Wang, H., Diaconescu, A., & Protzner, A. B. (2014). Spatiotemporal Dependency of Age-Related Changes in Brain Signal Variability. *Cerebral Cortex*, 24(7), 1806-1817. doi:10.1093/cercor/bht030
- Misic, B., Doesburg, S. M., Fatima, Z., Vidal, J., Vakorin, V. A., Taylor, M. J., & McIntosh, A. R. (2015). Coordinated Information Generation and Mental Flexibility: Large-Scale Network Disruption in Children with Autism. *Cerebral Cortex*, 25(9), 2815-2827. doi:10.1093/cercor/bhu082
- Misic, B., Vakorin, V. A., Paus, T., & McIntosh, A. R. (2011). Functional embedding predicts the variability of neural activity. *Frontiers in Systems Neuroscience*, 5, 90. doi:10.3389/fnsys.2011.00090
- Miskovic, V., Owens, M., Kuntzelman, K., & Gibb, B. E. (2016). Charting moment-to-moment brain signal variability from early to late childhood. *Cortex*, 83, 51-61. doi:10.1016/j.cortex.2016.07.006
- Mizuno, T., Takahashi, T., Cho, R. Y., Kikuchi, M., Murata, T., Takahashi, K., & Wada, Y. (2010). Assessment of EEG dynamical complexity in Alzheimer's disease using multiscale entropy. *Clinical Neurophysiology*, 121(9), 1438-1446. doi:10.1016/j.clinph.2010.03.025
- Nazari, A., Alavimajd, H., Shakeri, N., Bakhshandeh, M., Faghihzadeh, E., & Marzbani, H. (2019). Prediction of Brain Connectivity Map in Resting-State fMRI Data Using Shrinkage Estimator. *Basic Clin Neurosci*, 10(2), 147-156. doi:10.32598/bcn.9.10.140
- Ouyang, G. X., Li, J., Liu, X. Z., & Li, X. L. (2013). Dynamic characteristics of absence EEG recordings with multiscale permutation entropy analysis. *Epilepsy Research*, 104(3), 246-252. doi:10.1016/j.eplepsyres.2012.11.003
- Park, J. H., Kim, S., Kim, C. H., Cichocki, A., & Kim, K. (2007). Multiscale entropy analysis of EEG from patients under different pathological conditions. *Fractals-Complex Geometry Patterns and Scaling in Nature and Society*, 15(4), 399-404. doi:10.1142/S0218348x07003691
- Puce, A., Berkovic, S. F., Cadusch, P. J., & Bladin, P. F. (1994). P3 latency jitter assessed using 2 techniques. I. Simulated data and surface recordings in normal subjects. *Electroencephalogr Clin Neurophysiol*, 92(4), 352-364. doi:10.1016/0168-5597(94)90103-1
- Raja Beharelle, A., Kovacevic, N., McIntosh, A. R., & Levine, B. (2012). Brain signal variability relates to stability of behavior after recovery from diffuse brain injury. *Neuroimage*, 60(2), 1528-1537. doi:10.1016/j.neuroimage.2012.01.037
- Richman, J. S., & Moorman, J. R. (2000). Physiological time-series analysis using approximate entropy and sample entropy. *American Journal of Physiology-Heart and Circulatory Physiology*, 278(6), H2039-H2049.
- Riedl, M., Muller, A., & Wessel, N. (2013). Practical considerations of permutation entropy. *European Physical Journal-Special Topics*, 222(2), 249-262. doi:10.1140/epjst/e2013-01862-7
- Roldan, E. M., Molina-Pico, A., Cuesta-Frau, D., Martinez, P. M., & Crespo, S. O. (2011). Characterization of entropy measures against data loss: application to EEG records. *Conf Proc IEEE Eng Med Biol Soc*, 2011, 6110-6113. doi:10.1109/iembs.2011.6091509
- Sinai, M., Phillips, N. A., Chertkow, H., & Kabani, N. J. (2010). Task switching performance reveals heterogeneity amongst patients with mild cognitive impairment. *Neuropsychology*, 24(6), 757-774. doi:10.1037/a0020314
- Sleimen-Malkoun, R., Perdakis, D., Muller, V., Blanc, J. L., Huys, R., Temprado, J. J., & Jirsa, V. K. (2015). Brain Dynamics of Aging: Multiscale Variability of EEG Signals at Rest and during an Auditory Oddball Task(1,2,3). *Eneuro*, 2(3). doi:10.1523/ENEURO.0067-14.2015
- Szostakiwskyj, J. M. H., Willatt, S. E., Cortese, F., & Protzner, A. B. (2017). The modulation of EEG variability between internally-and externally-driven cognitive states varies with maturation and task performance. *Plos One*, 12(7). doi:10.1371/journal.pone.0181894
- Takahashi, T., Cho, R., Mizuno, T., Kikuchi, M., Murata, T., Takahashi, K., & Wada, Y. (2010). Antipsychotics reverse abnormal EEG complexity in drug-naive schizophrenia: A multiscale entropy analysis. *International Journal of Neuropsychopharmacology*, 13, 242-243.
- Takahashi, T., Cho, R. Y., Murata, T., Mizuno, T., Kikuchi, M., Mizukami, K., . . . Wada, Y. (2009). Age-related variation in EEG complexity to photic stimulation: A multiscale entropy analysis. *Clinical Neurophysiology*, 120(3), 476-483. doi:10.1016/j.clinph.2008.12.043

- Takahashi, T., Yoshimura, Y., Hiraishi, H., Hasegawa, C., Munesue, T., Higashida, H., . . . Kikuchi, M. (2016). Enhanced brain signal variability in children with autism spectrum disorder during early childhood. *Human Brain Mapping, 37*(3), 1038-1050. doi:10.1002/hbm.23089
- Ueno, K., Takahashi, T., Takahashi, K., Mizukami, K., Tanaka, Y., & Wada, Y. (2015). Neurophysiological basis of creativity in healthy elderly people: A multiscale entropy approach. *Clinical Neurophysiology, 126*(3), 524-531. doi:10.1016/j.clinph.2014.06.032
- Valencia, J. F., Porta, A., Vallverdu, M., Claria, F., Baranowski, R., Orłowska-Baranowska, E., & Caminal, P. (2009). Refined Multiscale Entropy: Application to 24-h Holter Recordings of Heart Period Variability in Healthy and Aortic Stenosis Subjects. *Ieee Transactions on Biomedical Engineering, 56*(9), 2202-2213. doi:10.1109/Tbme.2009.2021986
- Verhaeghe, J., Gravel, P., & Reader, A. J. (2010). Task-oriented quantitative image reconstruction in emission tomography for single- and multi-subject studies. *Phys Med Biol, 55*(23), 7263-7285. doi:10.1088/0031-9155/55/23/006
- Wang, H., Pexman, P. M., Turner, G., Cortese, F., & Protzner, A. B. (2018). The relation between Scrabble expertise and brain aging as measured with EEG brain signal variability. *Neurobiology of Aging, 69*, 249-260. doi:10.1016/j.neurobiolaging.2018.05.015
- Wang, H. Y., McIntosh, A. R., Kovacevic, N., Karachalios, M., & Protzner, A. B. (2016). Age-related Multiscale Changes in Brain Signal Variability in Pre-task versus Post-task Resting-state EEG. *Journal of Cognitive Neuroscience, 28*(7), 971-984. doi:10.1162/jocn\_a\_00947
- Wei, Q., Li, Y., Fan, S. Z., Liu, Q., Abbod, M. F., Lu, C. W., . . . Shieh, J. S. (2014). A critical care monitoring system for depth of anaesthesia analysis based on entropy analysis and physiological information database. *Australasian Physical & Engineering Sciences in Medicine, 37*(3), 591-605. doi:10.1007/s13246-014-0285-6
- Weng, W. C., Jiang, G. J., Chang, C. F., Lu, W. Y., Lin, C. Y., Lee, W. T., & Shieh, J. S. (2015). Complexity of Multi-Channel Electroencephalogram Signal Analysis in Childhood Absence Epilepsy. *Plos One, 10*(8), e0134083. doi:10.1371/journal.pone.0134083
- Xu, Y., Cui, J., Hong, W., & Liang, H. (2015). [Automatic Classification of Epileptic Electroencephalogram Signal Based on Improved Multivariate Multiscale Entropy]. *Sheng Wu Yi Xue Gong Cheng Xue Za Zhi, 32*(2), 256-262.
- Yang, A. C., Wang, S. J., Lai, K. L., Tsai, C. F., Yang, C. H., Hwang, J. P., . . . Fuh, J. L. (2013). Cognitive and neuropsychiatric correlates of EEG dynamic complexity in patients with Alzheimer's disease. *Progress in Neuro-Psychopharmacology & Biological Psychiatry, 47*, 52-61. doi:10.1016/j.pnpbp.2013.07.022
- Zanin, M., Zunino, L., Rosso, O. A., & Papo, D. (2012). Permutation Entropy and Its Main Biomedical and Econophysics Applications: A Review. *Entropy, 14*(8), 1553-1577. doi:10.3390/e14081553
- Zavala-Yoe, R., Ramirez-Mendoza, R., & Cordero, L. M. (2015). Novel way to investigate evolution of children refractory epilepsy by complexity metrics in massive information. *Springerplus, 4*. doi:10.1186/s40064-015-1173-6
